# Supplementary material
Source: PubMed Central journal article supplement (PMC7416529)
Supplement: NIHMS1614928-supplement-supplement.pdf [file NIHMS1614928-supplement-supplement.pdf]

## Supplementary Appendix

This appendix has been provided by the authors to give readers additional information about their work.

Supplement to: Dransfield MT, Voelker H, Bhatt SP, et al. Metoprolol for the prevention of acute exacerbations of COPD. *N Engl J Med* 2019;381:2304-14. DOI: 10.1056/NEJMoa1908142

(PDF updated on December 12, 2019)

## Supplementary Appendix

### Trial of Beta-Blockers for the Prevention of Acute Exacerbations of COPD

Mark T. Dransfield MD, Helen Voelker BA, Surya P. Bhatt MD, Keith Brenner MD, Richard Casaburi MD, Carolyn E. Come MD, J. Allen D. Cooper MD, Gerard J. Criner MD, Jeffrey L. Curtis MD, MeiLan K. Han MD, Umur Hatipoğlu MD, Erika S. Helgeson PhD, Vipul V. Jain MD, Ravi Kalhan MD, David Kaminsky MD, Robert Kaner MD, Ken M. Kunisaki MD, Allison A. Lambert MD, Matthew R. Lammi MD, Sarah Lindberg MPH, Barry J. Make MD, Fernando J. Martinez MD, Charlene McEvoy MD, Ralph J. Panos MD, Robert M. Reed MD, Paul D. Scanlon MD, Frank C. Scirba MD, Anthony Smith MD, P.S. Sriram MD, William W. Stringer MD, Jeremy A. Weingarten MD, J. Michael Wells MD, Elizabeth Westfall MPH, Stephen C. Lazarus MD, and John E. Connett PhD for the BLOCK COPD Study Group

| <b>Table of Contents</b>                   | <b>Page Number</b> |
|--------------------------------------------|--------------------|
| List of Investigators and Acknowledgements | 3                  |
| Supplementary Methods                      | 6                  |
| Supplementary Figures                      | 9                  |
| Supplementary Tables                       | 24                 |
| References                                 | 34                 |

## **List of Investigators and Study Acknowledgements**

### **Birmingham VA**

Allen Cooper (PI), Patti Smith (Coordinator).

### **Boston-Brigham and Women's Hospital and West Roxbury VA**

Carolyn E. Come (PI), Christina M. Mercugliano, Erick S. MacLean, Emily A. Holmes (Research Coordinators), Kevin M. Zinchuk (Research Pharmacist)

### **Cincinnati VA Medical Center**

Ralph Panos (PI), Kimberly Kersey, Laura Lach (Coordinators).

### **Cleveland Clinic**

Umur Hatipoglu (PI), Amy Attaway, Anu Suri, Mohammed Al-Jaghbeer, Sudhir Dudekonda, Muhammad Raza (Co-Investigators), Richard Rice, Jenna Brinker (Coordinators).

### **Columbia University**

Keith Brenner (PI), Immani Easthausen, M. Atif Choudhury, Maahika Srinivasan, Sana Sajjad, Onumara Opara (Coordinators).

### **Health Partners**

Charlene E McEvoy (PI), Pamela J Neuenfeldt, Cheryl Sasse (Coordinators).

### **LABIOMED-Harbor-UCLA Medical Center**

W. Stringer (PI), R. Casaburi, H. Rossiter, J. Porszasz (Co-investigators), L. Diaz, R. Indelicato, C. Lopez-Garcia, R. Calmelat, D. Cavanaugh - (Coordinators).

### **Louisiana State University**

Matthew R. Lammi (PI), Connie Romaine, Marie Sandi, Paula Lauto (Coordinators).

### **Mayo Clinic**

Paul D. Scanlon (PI), Jeremy Clain, Alexander Niven, Megan Dulohery Scrodin (Co-Investigators), Boleyn Andrist, Alana English, Tami S. Krpata (Coordinators).

### **Minneapolis VA Health Care System**

Ken Kunisaki (PI) Megan Campbell, Miranda DeConcini (Coordinators) Anne Melzer, Chris Wendt, Erin Wetherbee (Co-Investigator), Doug DeCarolis (Research Pharmacist).

### **National Jewish**

Barry Make (PI), Steven Lommatzsch, Amen Sergew (Co-Investigators), Jennifer Underwood (Coordinator).

### **New York-Presbyterian Weill Cornell Medical College**

Robert J. Kaner (PI), Fernando J. Martinez, Ben-Gary Harvey, Daniel Libby, Laura Libby, Brian Gelbman, David Chappell Weir, Andrea Shiolo, Jamuna Krishnan, William Zhengyang Zhang (Co-Investigators), Elizabeth Peters, Alicia J. Morris, Matthew Marcelino (Coordinators).

### **New York-Presbyterian Brooklyn Methodist Hospital**

Jeremy Weingarten (PI), Anthony Saleh, Saleem Shahzad, Liziamma George, Liam Gross (Co-PIs), Puja Chadha, Christina Edwards (Coordinators).

**New York-Presbyterian Queens**

Anthony Smith (PI), Susan Ingenito (Coordinator)

**Northwestern University**

Ravi Kalhan (PI), Sharon Rosenberg, Lewis Smith, Jenny Hixon, Allison Rogowski, Alyssa Frederick (Coordinators).

**Providence Medical Group, Spokane**

Allison A. Lambert (PI), Radica Alicic, Thomas DeCato (Co-investigators), Lisa Davis (Coordinator).

**Temple School of Pharmacy**

David Lebo, Michael Jacobs.

**Temple University**

Gerard Criner (PI), Nathaniel Marchetti (co-investigator), Helga Criner, Dee Fehrle, Joseph Lambert (Coordinators).

**University of Alabama at Birmingham**

Mark Dransfield (PI), Surya Bhatt, J. Michael Wells, Anand Iyer, Trisha Parekh, Steven Lloyd, Gregory Payne, Samuel McElwee (Co-Investigators), Elizabeth Westfall (Project Manager), Keenya Mathews, Renita Holmes (Coordinators).

**University of California, Fresno**

Vipul Jain (PI), Dennis Richard Allison, John McClain (Co-investigators), Janna Blaauw, Griselda Aguilar, Alexa Lopez (Coordinators).

**University of California San Francisco (UCSF)**

Stephen C. Lazarus, (PI), Prescott G. Woodruff, (Co-Investigator), Julian Silva (Coordinators).

**University of Maryland**

Robert Reed (PI), Giora Netzer (Co-investigator), Archana Patel, Maura Deeley, (Coordinators), Saif M Borgan, Sadam Haddadin, Hasan Radhi, Hassan A Haji, Nirali Marvania (Research assistants).

**University of Michigan**

MeiLan K. Han (PI), Wassim Labaki (co-investigator), Mary Kay Hamby (Coordinator).

**University of Minnesota (Data Coordinating Center)**

John E. Connett (PI), Chris Wendt (Co-PI), Sarah Lindberg, Helen Voelker (Study Coordinators), Irene Olson (Quality Control).

**University of Pittsburgh**

Frank Scieurba (PI), Divay Chandra, Jessica Bon Field, Michael Emmet O'Brien, Craig Riley, (Co-Investigators), Paula Consolaro, Megan D'Innocenzo, Kelsey Elliott, Christina Ledezma, Jenna Smith, Elizabeth Stempkowski (Coordinators), Daniel Arminavage, Robert Wilson (PFT Technicians), Rhonda Lincoln (Project Administrator).

**University of Vermont**

David A. Kaminsky (PI), Erika Gonyaw, Chloe Housenger, Kevin Hodgdon, Heidi Pecott-Grimm (Coordinators)

**VA Ann Arbor Healthcare System, Ann Arbor, MI**  
Jeffrey L. Curtis (PI), Lisa McCloskey (Coordinator).

**Data and Safety Monitoring Committee**  
Nadia Hansel (Research Monitor), Vera Bittner, James Tonascia.

**Congressionally Directed Medical Research Programs (CDMRP)**  
Sandy Snyder (Science Officer) and Usamah Kayyali (Science Officer)

## Supplementary Methods

### Conditional Power Analyses

The original alternative hypothesis for the trial was that 65% of participants in the placebo group would have at least 1 exacerbation in 1 year, whereas 55% of those in the metoprolol group would have at least 1 exacerbation in 1 year. The primary outcome was time to occurrence of a first exacerbation (mild, moderate, severe, or very severe).

The original projected sample size, allowing for 12% dropout, was  $N = 1028$ . This assumes a treatment effect for the primary outcome as noted above (65% vs. 55%), and a power of 90%.

With 520 participants contributing data, there was no evidence of a treatment effect favoring the beta-blocker.

As was done at the previous DSMB meeting, we carried out simulation studies to investigate conditional probabilities of seeing a significant difference between the groups if the trial continued with evaluation of  $N = 1028$  participants. Conditional here means that we accept all of the outcome data that we have observed up to the present time for 520 participants. The simulation studies made assumptions regarding the probabilities of future primary outcome events, as follows:

Simulation study #1: Conditional on the current observed data, and assume the future probabilities of events agree with the original alternative hypothesis (65% vs. 55%).

Simulation study #2: Conditional on the current observed data, and assume the future probabilities of having an exacerbation are the same as what we have observed so far.

Simulation study #3: Conditional on the current observed data, and assume the future probabilities of having an exacerbation are the same for both groups (65%).

All three studies involved 10,000 simulated trials. The simulations also required simulations of deaths and withdrawals (based on observed rates).

Conditional Power for the three scenarios:

Simulation study #1: The estimated probability of seeing a significant difference between the two groups is 6.1%.

Simulation study #2: The estimated probability of seeing a significant difference between the two groups is 30.0% but in favor of placebo.

Simulation study #3: The estimated probability of seeing a significant difference between the two groups is 7.2%.

### **Analysis of Secondary Endpoints**

For evaluation of secondary study endpoints (FEV<sub>1</sub>, six-minute walk distance, SGRQ, CAT, SOBQ) and cardiac measures (heart rate, systolic and diastolic blood pressure), close-out visit measurements from participants who ended the study early were analyzed as if they were measured at the next scheduled study visit. Due to differences in time on metoprolol or placebo, cardiac measurements taken during the weaning period from individuals who ended the study early were not included in the analysis of secondary endpoints.

### **Study Design, Data Collection, Analysis, and Manuscript Preparation.**

The study was designed by MTD and SPB in conjunction with the Steering Committee members who are listed as authors. The data were gathered by all participating centers as listed in the acknowledgements. The data were analyzed by the Data Coordinating Center (JEC, ESH, HV, SL) and vouched for by both the DCC and MTD. MTD wrote the first draft of the manuscript. The DCC, MTD and the Steering Committee approved the decision to publish the paper and



approved the final submitted version. There were no agreements concerning confidentiality of the data between the sponsor and the authors or the participating institutions.

Supplemental Figure S1a. Effect of Metoprolol on the Time to the First Chronic Obstructive Pulmonary Disease Exacerbation of Moderate Severity or Greater (Exacerbation Leading to a Visit to an Emergency Department, Hospitalization, or Hospitalization with Intubation and Mechanical Ventilation).

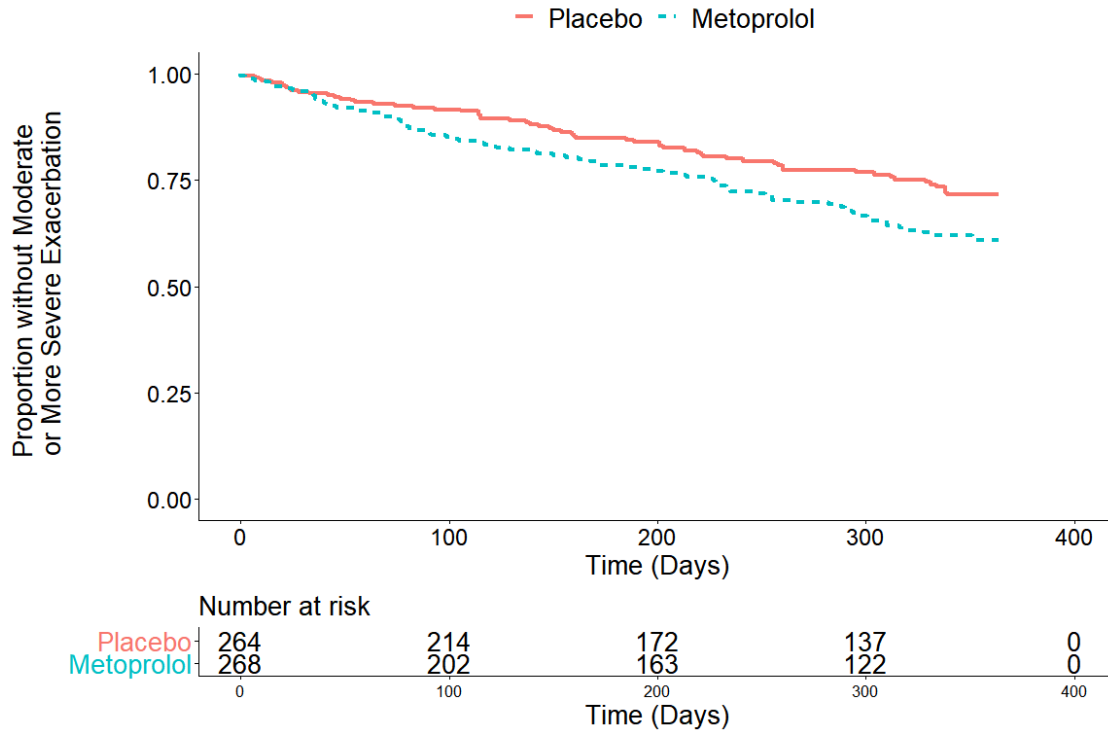

Exacerbations of moderate severity or greater occurred in 86/268 (32.1%) of participants assigned to metoprolol and 61/264 (23.1%) of participants assigned to placebo.

Supplemental Figure S1b. Effect of Metoprolol on Survival.

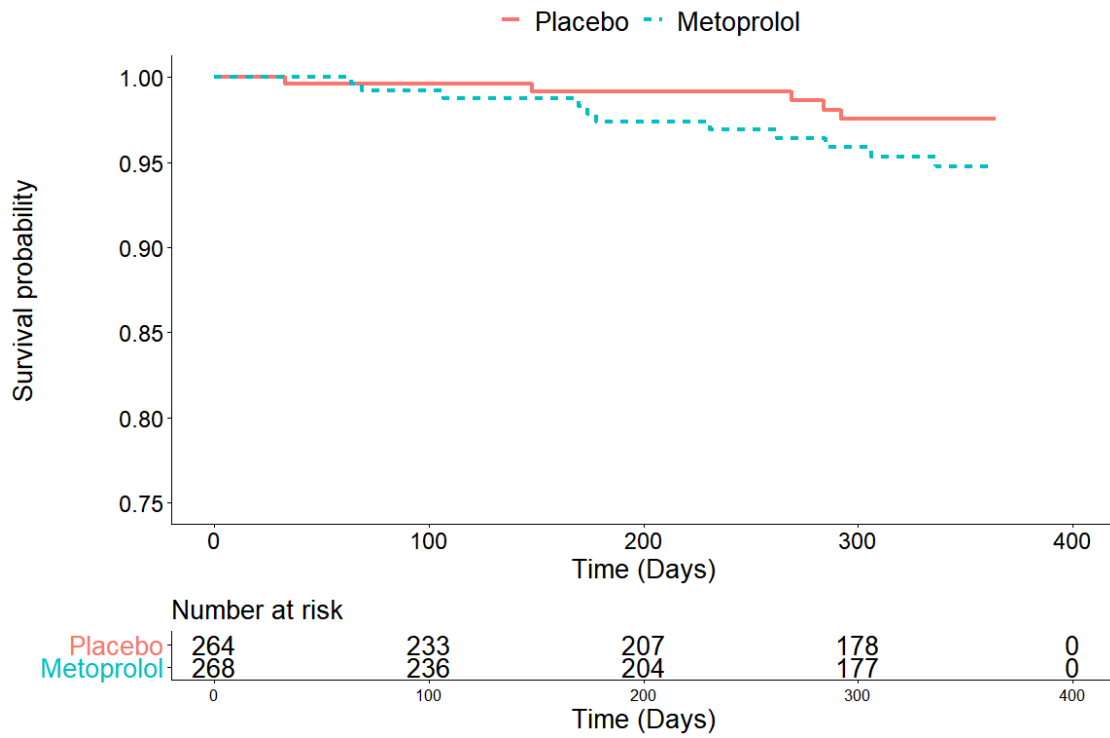

Deaths during the treatment period occurred in 11/268 (4.1%) of participants assigned to metoprolol and 5/264 (1.9%) of participants assigned to placebo.

Supplemental Figure S2a. Hazard Ratios with 95% Confidence Intervals for the Risk of Any Exacerbation in Those Assigned to Metoprolol Compared with Placebo By Subgroup.

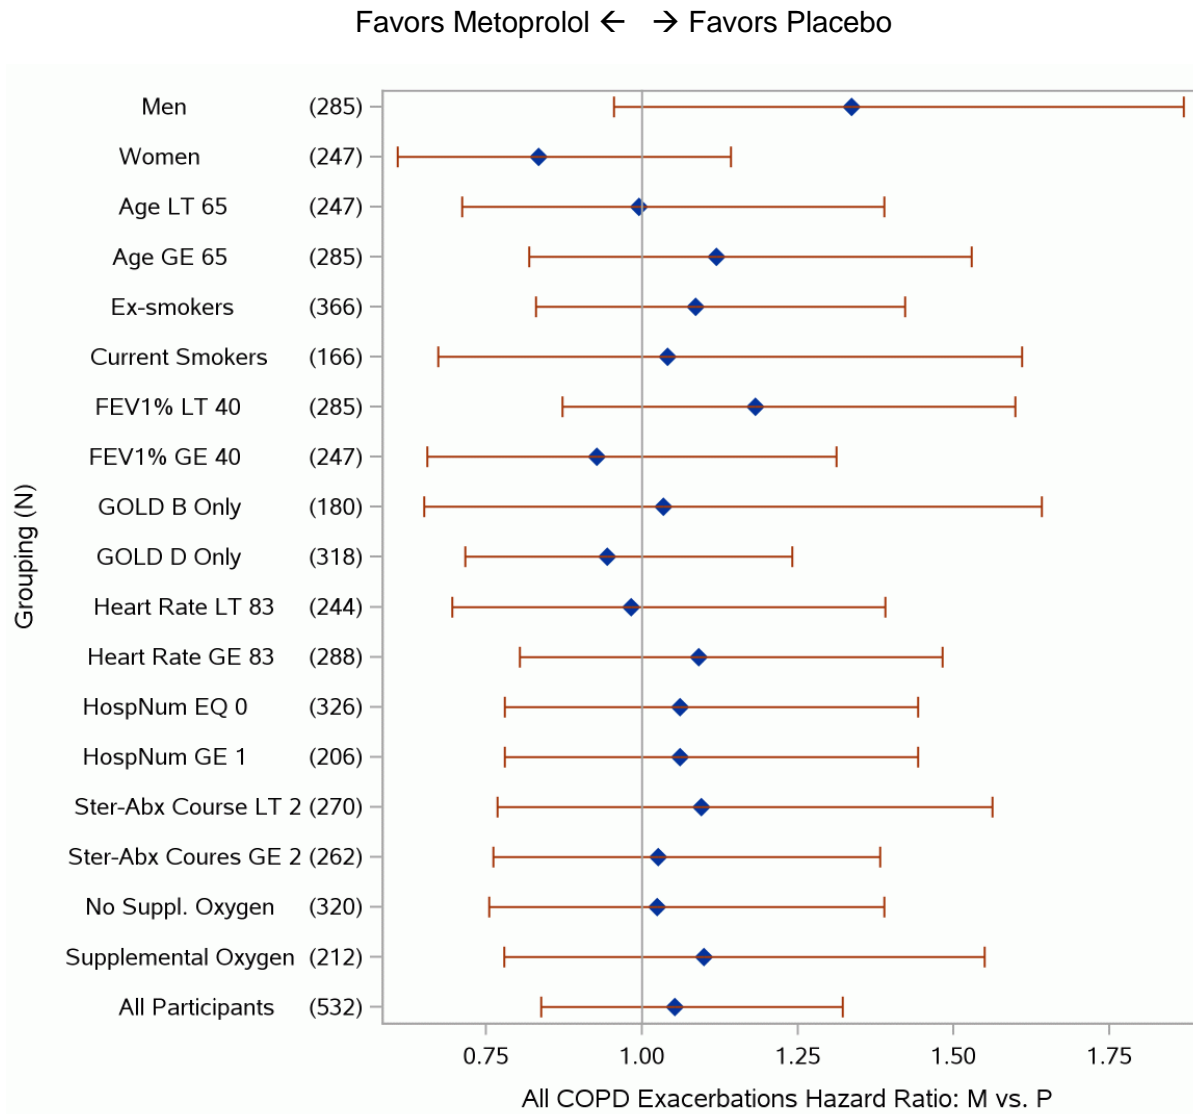

Abbreviations: GOLD (Global Initiative for Chronic Obstructive Lung Disease), LT (less than), GE (greater than or equal to), EQ (equal to), Ster-Abx (receipt of steroids and/or antibiotics for respiratory problems in the year prior), FEV<sub>1</sub>% (forced expiratory volume %predicted).

Supplemental Figure S2b. Hazard Ratios with 95% Confidence Intervals for the Risk of Severe or Very Severe Exacerbation in Those Assigned to Metoprolol Compared with Placebo By Subgroup.

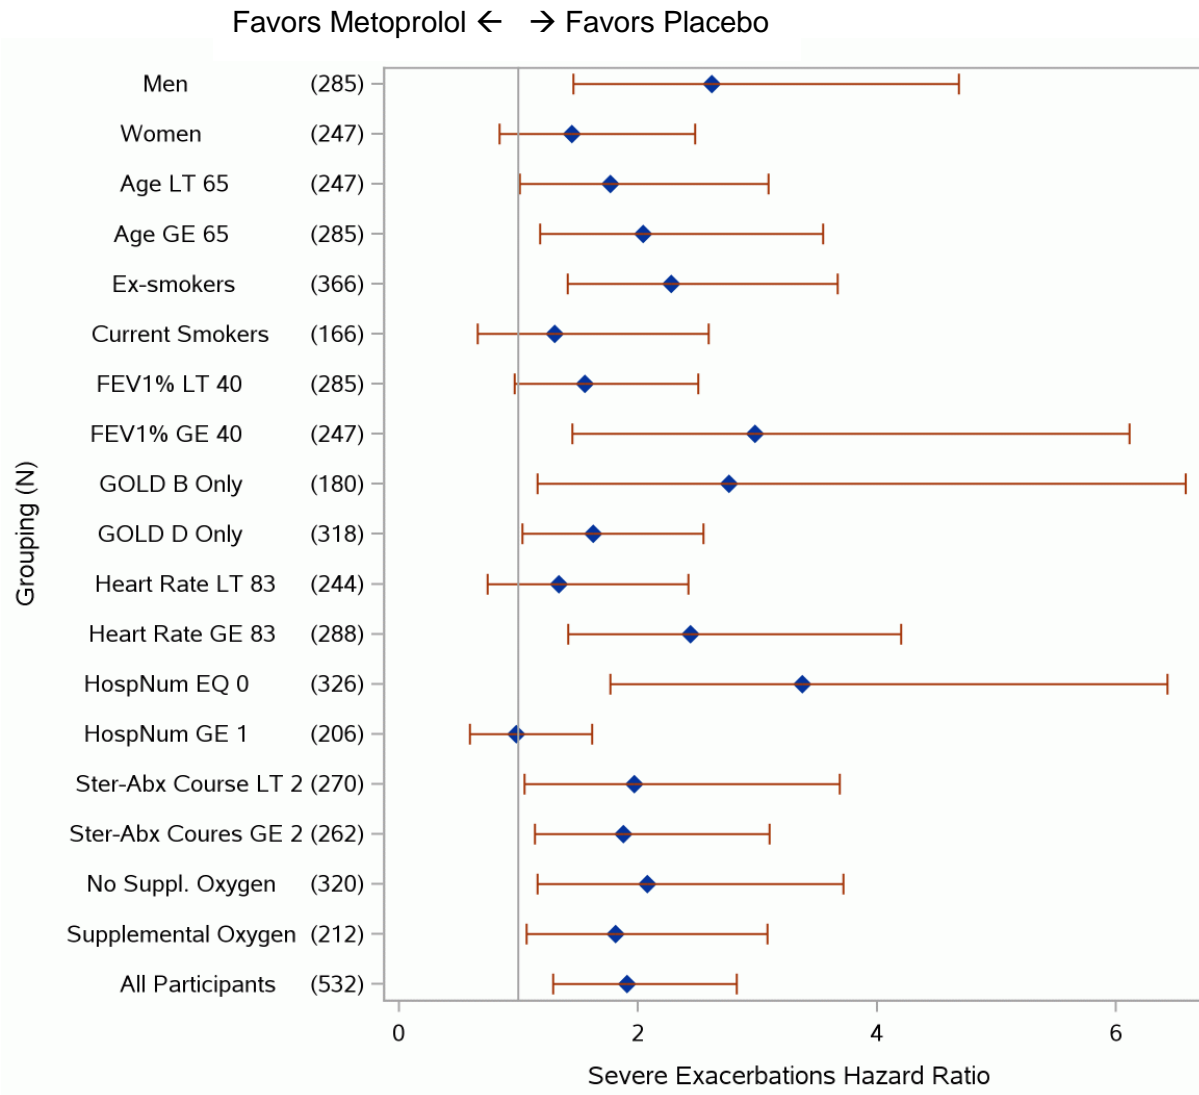

Abbreviations: GOLD (Global Initiative for Chronic Obstructive Lung Disease), LT (less than), GE (greater than or equal to), EQ (equal to), Ster-Abx (receipt of steroids and/or antibiotics for respiratory problems in the year prior), FEV<sub>1</sub>% (forced expiratory volume %predicted).

Supplemental Figure S3a. Histogram of all Exacerbations by Study Group.

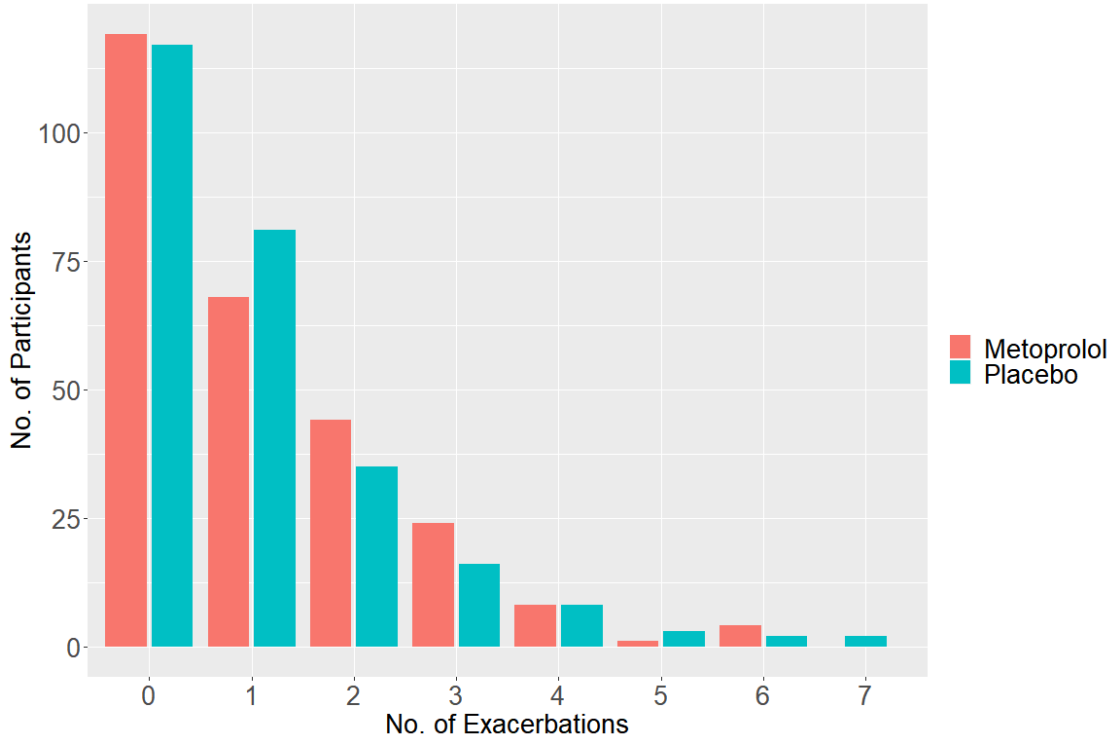

Supplemental Figure S3b. Histogram of Exacerbations of Moderate Severity or Greater by Study Group.

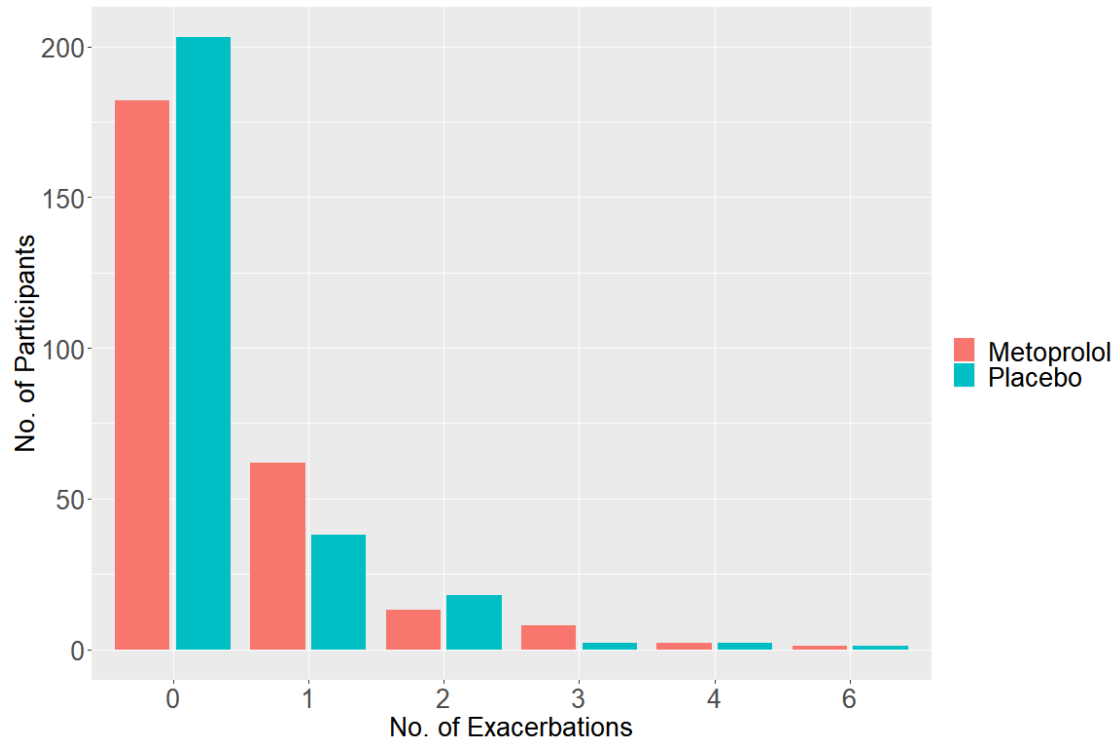

Supplemental Figure S3c. Histogram of Severe or Very Severe Exacerbations by Study Group.

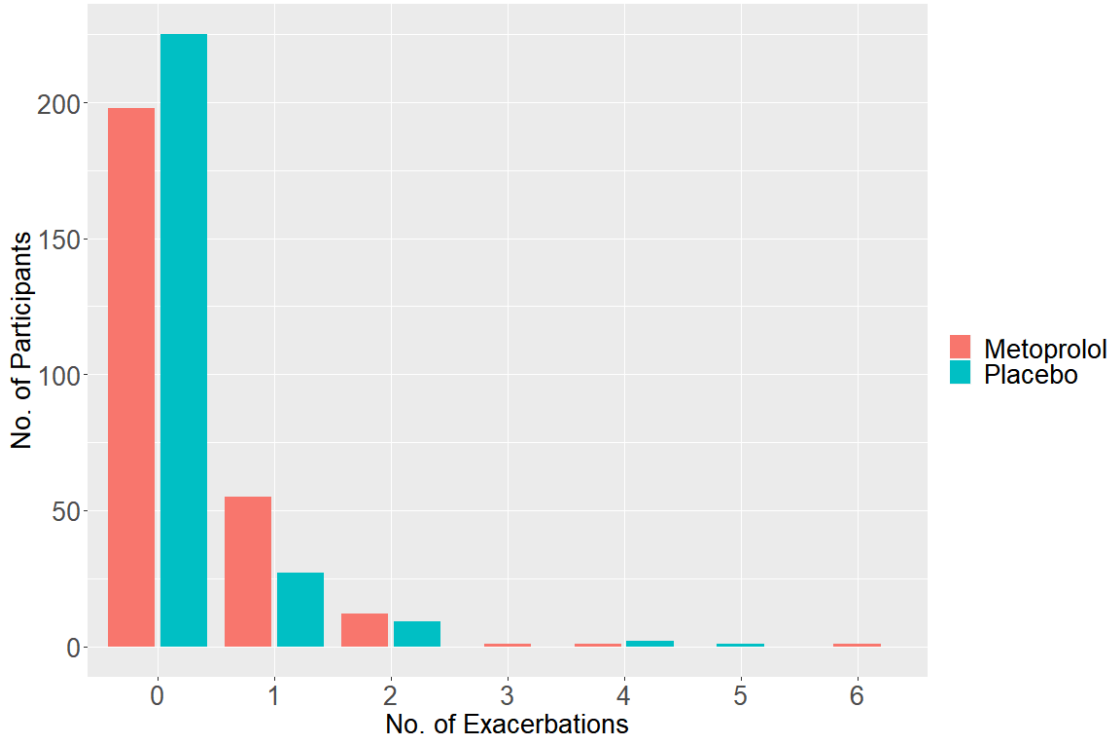



Supplemental Figure S4. Forced expiratory volume in 1 second (FEV<sub>1</sub>) %predicted with 95% confidence intervals.

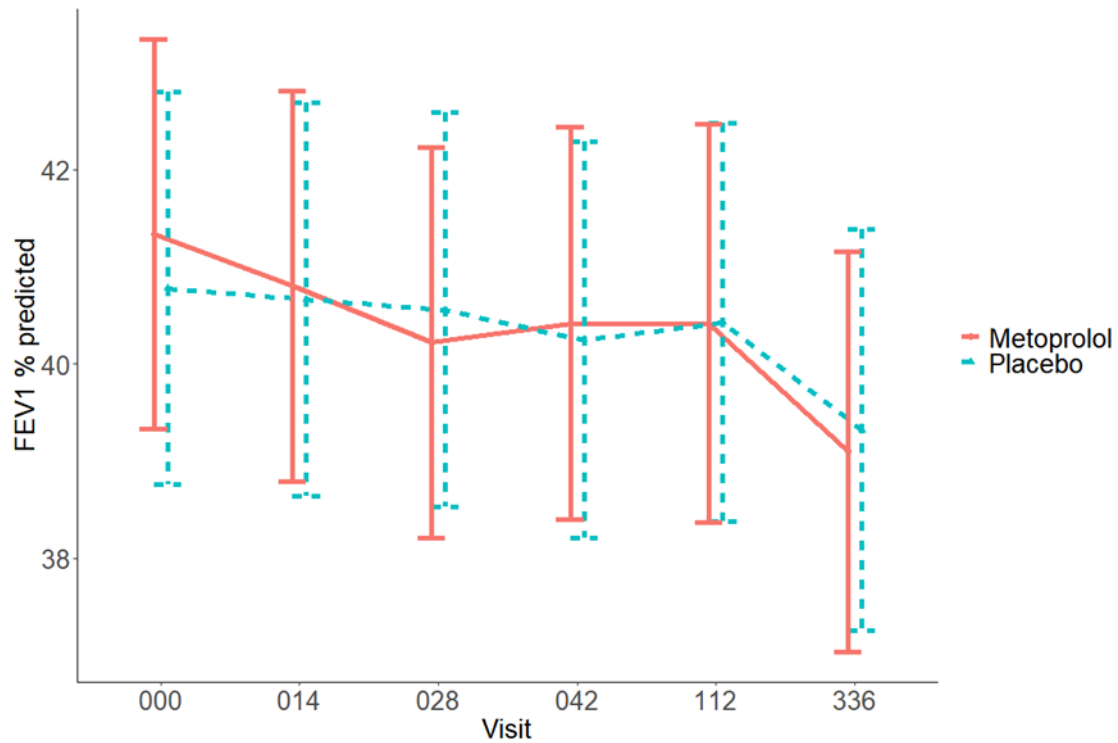

Count of participants by assignment and visit day

|            | 000 | 014 | 028 | 042 | 112 | 336 |
|------------|-----|-----|-----|-----|-----|-----|
| Placebo    | 264 | 254 | 247 | 238 | 216 | 197 |
| Metoprolol | 268 | 258 | 255 | 243 | 203 | 193 |

Estimated difference in change from baseline FEV<sub>1</sub> %predicted between groups

| Difference in change: metoprolol minus placebo | Estimate (95% CI)   |
|------------------------------------------------|---------------------|
| Baseline to day 014 visit                      | -0.42 (-1.76, 0.92) |
| Baseline to day 028 visit                      | -0.89 (-2.25, 0.46) |
| Baseline to day 042 visit                      | -0.39 (-1.76, 0.98) |
| Baseline to day 112 visit                      | -0.57 (-2.00, 0.87) |
| Baseline to day 336 visit                      | -0.78 (-2.25, 0.69) |

Supplemental Figure S5. Six-minute walk distance with 95% confidence intervals.

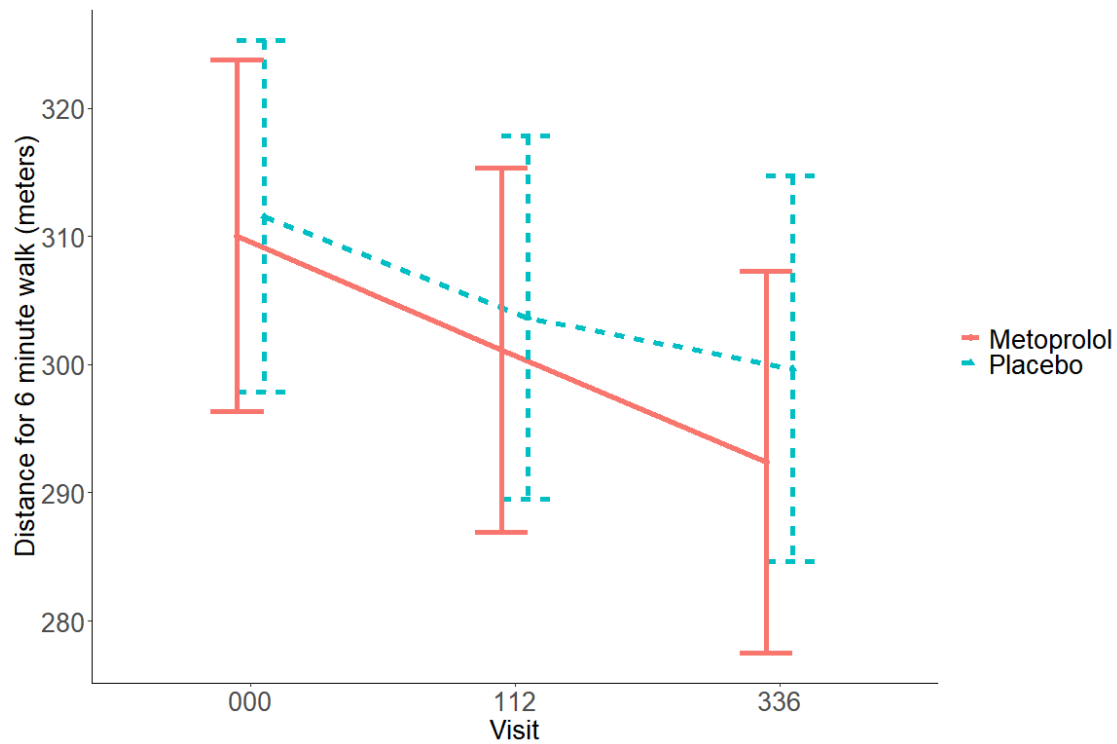

Count of participants by assignment and visit day

|            | 000 | 112 | 336 |
|------------|-----|-----|-----|
| Placebo    | 259 | 220 | 166 |
| Metoprolol | 259 | 216 | 174 |

Estimated difference in change from baseline in six-minute walk distance (meters) between groups

| Difference in change: metoprolol minus placebo | Estimate (95% CI)     |
|------------------------------------------------|-----------------------|
| Baseline to day 112 visit                      | -1.03 (-15.39, 13.33) |
| Baseline to day 336 visit                      | -5.77 (-21.59, 10.06) |

Supplemental Figure S6. St. George's Respiratory Questionnaire (SGRQ) score with 95% confidence intervals.

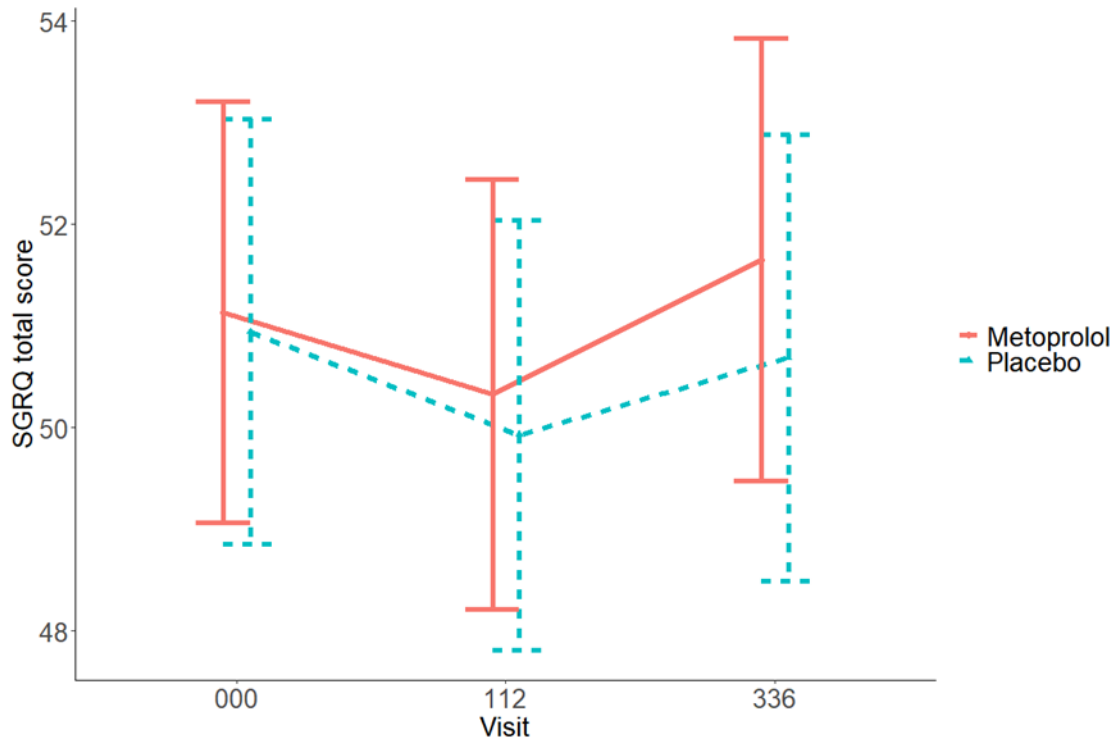

Count of participants by assignment and visit day

|            | 000 | 112 | 336 |
|------------|-----|-----|-----|
| Placebo    | 263 | 248 | 200 |
| Metoprolol | 268 | 241 | 203 |

*Estimated difference in change from baseline SGRQ between groups*

| Difference in change: metoprolol minus placebo | Estimate (95% CI)  |
|------------------------------------------------|--------------------|
| Baseline to day 112 visit                      | 0.21 (-1.80, 2.21) |
| Baseline to day 336 visit                      | 0.77 (-1.38, 2.92) |

Scores on the SGRQ range from 0 to 100, with lower scores indicating better functioning and with a minimal clinically important difference (MCID) of 4 points<sup>1</sup>.

Supplemental Figure S7. COPD Assessment Test (CAT) score with 95% confidence intervals.

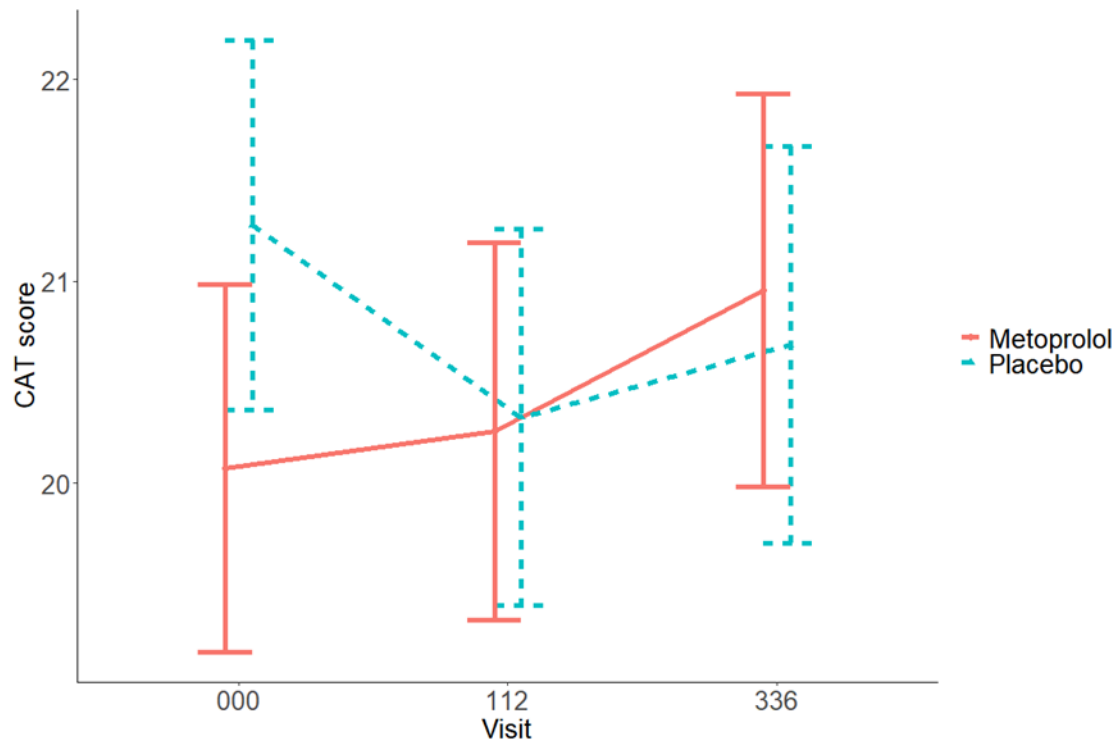

Count of participants by assignment and visit day

|            | 000 | 112 | 336 |
|------------|-----|-----|-----|
| Placebo    | 264 | 248 | 200 |
| Metoprolol | 268 | 241 | 206 |

Estimated difference in change from baseline in CAT between groups

| Difference in change: metoprolol minus placebo | Estimate (95% CI) |
|------------------------------------------------|-------------------|
| Baseline to day 112 visit                      | 1.13 (0.06, 2.20) |
| Baseline to day 336 visit                      | 1.47 (0.32, 2.62) |

Scores on the CAT range from 0 to 40, with lower scores indicating better functioning and with a MCID of 2 points<sup>2</sup>.

Supplemental Figure S8. San Diego Shortness of Breath Questionnaire (SOBQ) score with 95% confidence intervals.

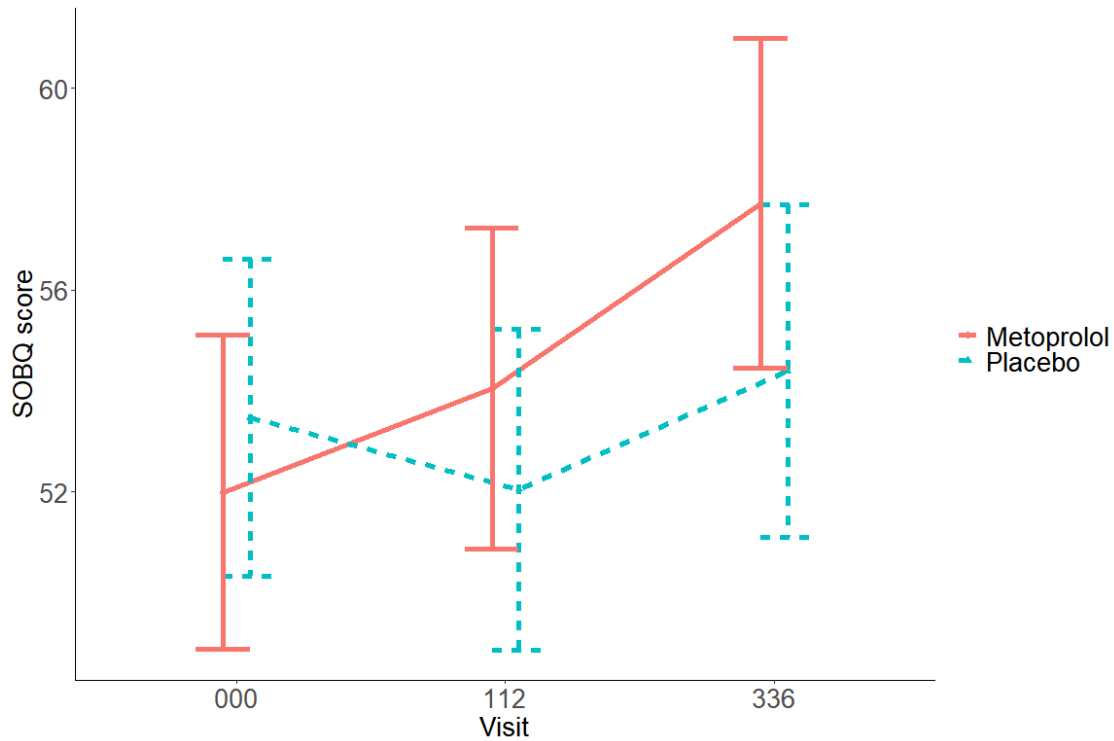

Count of participants by assignment and visit day

|            | 000 | 112 | 336 |
|------------|-----|-----|-----|
| Placebo    | 262 | 247 | 199 |
| Metoprolol | 265 | 240 | 204 |

Estimated difference in change from baseline in SOBQ between groups

| Difference in change: metoprolol minus placebo | Estimate (95% CI) |
|------------------------------------------------|-------------------|
| Baseline to day 112 visit                      | 3.47 (0.42, 6.52) |
| Baseline to day 336 visit                      | 4.80 (1.52, 8.07) |

Scores on the SOBQ range from 0 to 120, with lower scores indicating less dyspnea and with an MCID of 5 points<sup>3</sup>.

Supplemental Figure S9a. Heart rate with 95% confidence interval.

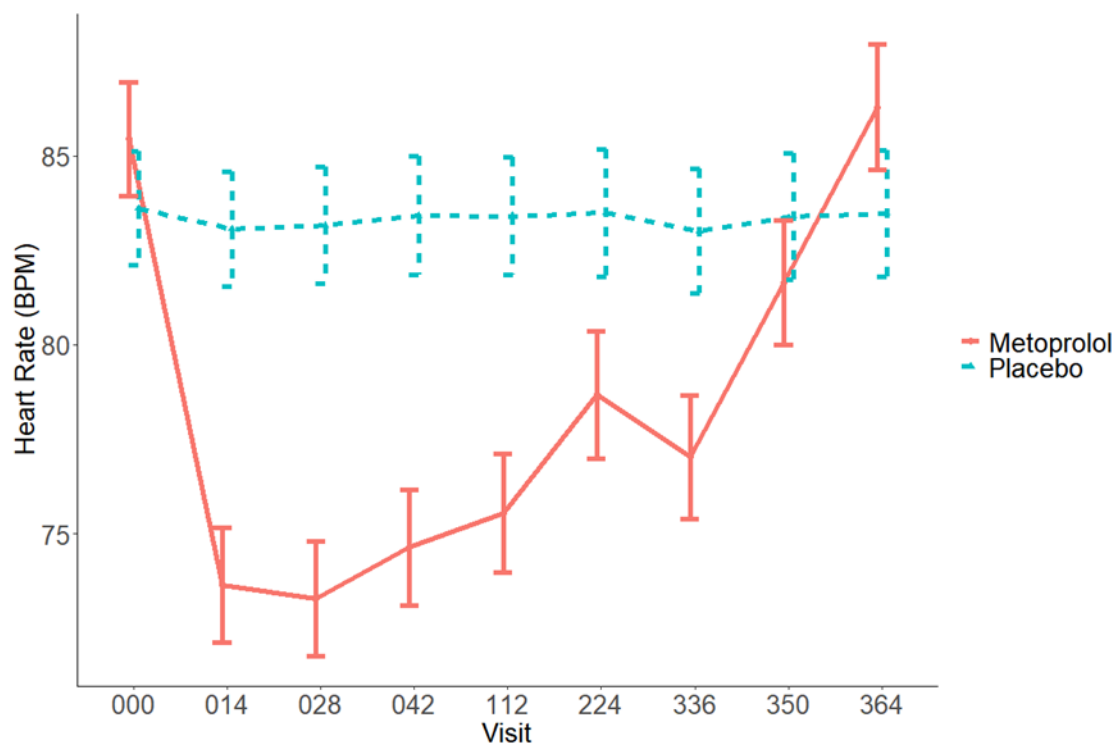

Count of participants by assignment and visit day

|            | 000 | 014 | 028 | 042 | 112 | 224 | 336 | 350 | 364 |
|------------|-----|-----|-----|-----|-----|-----|-----|-----|-----|
| Placebo    | 264 | 255 | 250 | 238 | 234 | 183 | 197 | 189 | 187 |
| Metoprolol | 268 | 260 | 259 | 248 | 227 | 180 | 200 | 193 | 189 |

Estimated difference in change from baseline in heart rate between groups

| Difference in change: metoprolol minus placebo | Estimate (95% CI)      |
|------------------------------------------------|------------------------|
| Baseline to day 14 visit                       | -11.26 (-13.34, -9.19) |
| Baseline to day 28 visit                       | -11.73 (-13.81, -9.64) |
| Baseline to day 43 visit                       | -10.64 (-12.75, -8.52) |
| Baseline to day 112 visit                      | -9.71 (-11.85, -7.56)  |
| Baseline to day 224 visit                      | -6.66 (-8.98, -4.35)   |
| Baseline to day 336 visit                      | -7.83 (-10.08, -5.58)  |
| Baseline to day 350 visit                      | -3.59 (-5.87, -1.32)   |
| Baseline to day 364 visit                      | 0.96 (-1.33, 3.25)     |

Supplemental Figure S9b. Systolic blood pressure with 95% confidence interval.

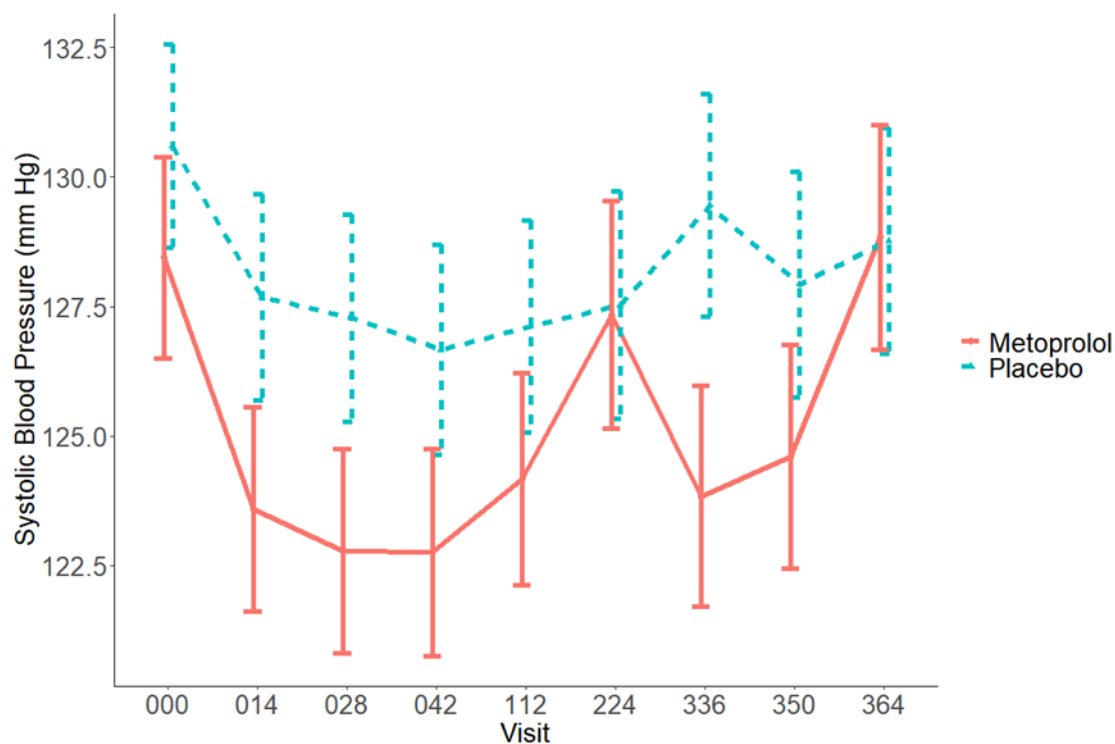

Count of participants by assignment and visit day

|            | 000 | 014 | 028 | 042 | 112 | 224 | 336 | 350 | 364 |
|------------|-----|-----|-----|-----|-----|-----|-----|-----|-----|
| Placebo    | 263 | 255 | 250 | 238 | 234 | 183 | 196 | 189 | 187 |
| Metoprolol | 268 | 260 | 259 | 248 | 228 | 180 | 199 | 193 | 189 |

Estimated difference in change from baseline in systolic blood pressure between groups

| Difference in change: metoprolol minus placebo | Estimate (95% CI)    |
|------------------------------------------------|----------------------|
| Baseline to day 14 visit                       | -1.94 (-4.68, 0.80)  |
| Baseline to day 28 visit                       | -2.34 (-5.09, 0.41)  |
| Baseline to day 42 visit                       | -1.75 (-4.54, 1.04)  |
| Baseline to day 112 visit                      | -0.80 (-3.64, 2.04)  |
| Baseline to day 224 visit                      | 1.97 (-1.08, 5.03)   |
| Baseline to day 336 visit                      | -3.47 (-6.44, -0.49) |
| Baseline to day 350 visit                      | -1.18 (-4.19, 1.83)  |
| Baseline to day 364 visit                      | 2.23 (-0.80, 5.25)   |

Supplemental Figure S9c. Diastolic blood pressure with 95% confidence interval.

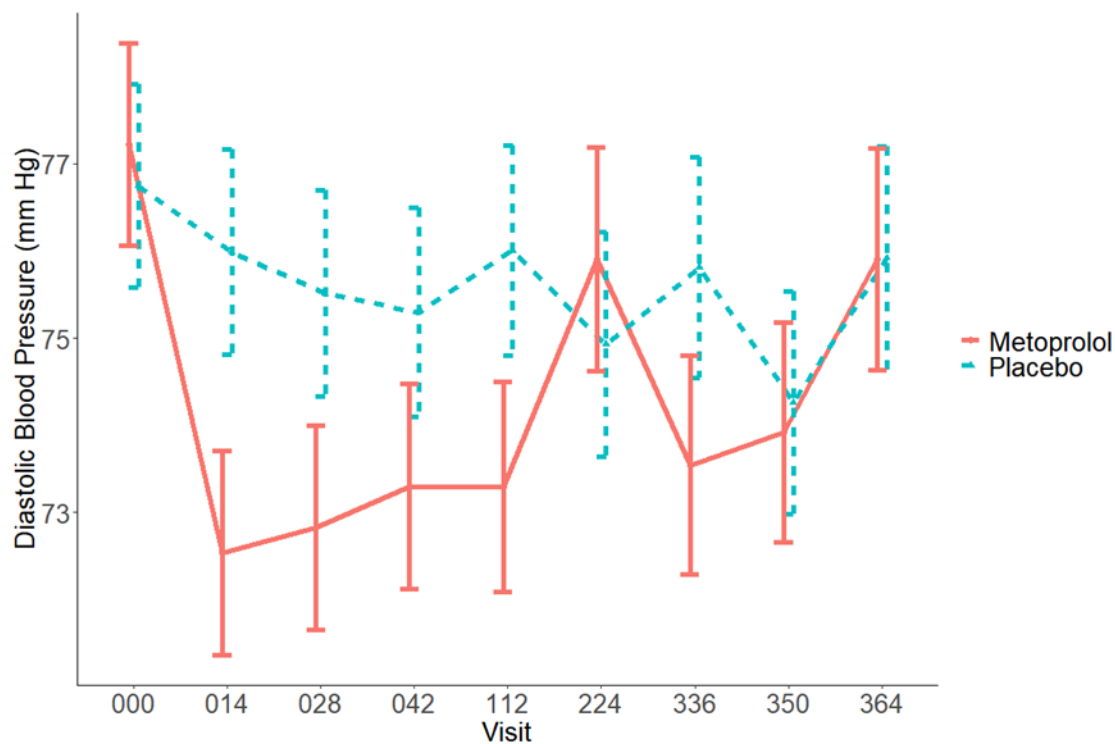

Count of participants by assignment and visit day

|            | 000 | 014 | 028 | 042 | 112 | 224 | 336 | 350 | 364 |
|------------|-----|-----|-----|-----|-----|-----|-----|-----|-----|
| Placebo    | 263 | 255 | 250 | 238 | 234 | 183 | 196 | 189 | 187 |
| Metoprolol | 268 | 260 | 259 | 248 | 228 | 180 | 199 | 193 | 189 |

Estimated difference in change from baseline in diastolic blood pressure between groups

| Difference in change: metoprolol minus placebo | Estimate (95% CI)    |
|------------------------------------------------|----------------------|
| Baseline to day 14 visit                       | -3.93 (-5.45, -2.42) |
| Baseline to day 28 visit                       | -3.17 (-4.69, -1.65) |
| Baseline to day 42 visit                       | -2.48 (-4.02, -0.93) |
| Baseline to day 112 visit                      | -3.19 (-4.76, -1.62) |
| Baseline to day 224 visit                      | 0.50 (-1.19, 2.19)   |
| Baseline to day 336 visit                      | -2.75 (-4.39, -1.10) |
| Baseline to day 350 visit                      | -0.82 (-2.49, 0.84)  |
| Baseline to day 364 visit                      | -0.49 (-2.16, 1.19)  |



Supplemental Table S1. Characteristics of the Participants.

| Characteristic                                              | Metoprolol  | Placebo     | Total       |
|-------------------------------------------------------------|-------------|-------------|-------------|
|                                                             | N=268       | N=264       | N=532       |
| Age, years                                                  | 65.2 ± 7.6  | 64.8 ± 7.9  | 65.0 ± 7.8  |
| Race                                                        |             |             |             |
| White                                                       | 178 (66.4)  | 194 (73.5)  | 372 (69.9)  |
| Black                                                       | 83 (31.0)   | 60 (22.7)   | 143 (26.9)  |
| Other                                                       | 7 (2.6)     | 10 (3.8)    | 17 (3.2)    |
| Female sex, no. (%)                                         | 124 (46.3)  | 123 (46.6)  | 247 (46.4)  |
| FEV <sub>1</sub> after bronchodilator, L                    | 1.1±0.5     | 1.1±0.5     | 1.1±0.5     |
| FEV <sub>1</sub> after bronchodilator, % of predicted value | 41.3 ± 16.3 | 40.8 ± 16.2 | 41.1 ± 16.3 |
| FEV <sub>1</sub> /FVC, %                                    | 44.2 ± 11.7 | 45.2 ± 21.6 | 44.7 ± 17.3 |
| GOLD Spirometric Classification, no. (%)                    |             |             |             |
| 1                                                           | 1 (0.4)     | 1 (0.4)     | 2 (0.4)     |
| 2                                                           | 84 (31.3)   | 75 (28.4)   | 159 (29.9)  |
| 3                                                           | 98 (36.6)   | 110 (41.7)  | 208 (39.1)  |
| 4                                                           | 85 (31.7)   | 78 (29.5)   | 163 (30.6)  |
| GOLD 2019 Classification, no. (%)                           |             |             |             |
| A                                                           | 6 (2.2)     | 5 (1.9)     | 11 (2.1)    |
| B                                                           | 56 (20.9)   | 86 (32.6)   | 142 (26.7)  |

|                                         |              |              |              |
|-----------------------------------------|--------------|--------------|--------------|
| C                                       | 14 (5.2)     | 9 (3.4)      | 23 (4.3)     |
| D                                       | 192 (71.6)   | 164 (62.1)   | 356 (66.9)   |
| Smoking history, pack-years             | 50.7 ± 28.7  | 49.5 ± 29.6  | 50.1 ± 29.1  |
| Current smoking, no. (%)                | 95 (35.4)    | 71 (26.9)    | 166 (31.2)   |
| COPD Medication, no. (%)                |              |              |              |
| Inhaled glucocorticoids, LABA, and LAMA | 154 (57.5)   | 160 (60.6)   | 314 (59.0)   |
| Inhaled glucocorticoids and LABAs only  | 45 (16.8)    | 51 (19.3)    | 96 (18.0)    |
| LAMAs only                              | 20 (7.5)     | 17 (6.4)     | 37 (7.0)     |
| LABAs and LAMAs only                    | 11 (4.1)     | 13 (4.9)     | 24 (4.5)     |
| Inhaled glucocorticoids and LAMAs only  | 8 (3.0)      | 6 (2.3)      | 14 (2.6)     |
| Inhaled glucocorticoids only            | 5 (1.9)      | 2 (0.8)      | 7 (1.3)      |
| Other                                   | 25 (9.3)     | 15 (5.7)     | 40 (7.5)     |
| BMI, kg/m <sup>2</sup>                  | 26.9 ± 6.9   | 27.4 ± 6.1   | 27.2 ± 6.5   |
| Heart rate, beats per minute            | 85.5 ± 10.8  | 83.6 ± 11.7  | 84.5 ± 11.3  |
| Systolic blood pressure, mm Hg          | 128.4 ± 16.5 | 130.6 ± 15.9 | 129.5 ± 16.2 |
| Diastolic blood pressure, mm Hg         | 77.2 ± 9.2   | 76.8 ± 9.1   | 77.0 ± 9.1   |
| Coronary artery disease, no. (%)        | 40 (14.9)    | 39 (14.8)    | 79 (14.8)    |
| Diabetes, no. (%)                       | 44 (16.4)    | 40 (15.2)    | 84 (15.8)    |
| Hypertension, no. (%)                   | 118 (44.0)   | 129 (48.9)   | 247 (46.4)   |
| Statin use, no. (%)                     | 97 (36.2)    | 96 (36.4)    | 193 (36.3)   |

|                                                                                          |            |            |            |
|------------------------------------------------------------------------------------------|------------|------------|------------|
| Number of courses of systemic glucocorticoid or antibiotic use within previous 12 months | 1.9 ± 1.5  | 1.9 ± 1.7  | 1.9 ± 1.6  |
| Number of hospitalizations within previous 12 months                                     | 0.7 ± 1.0  | 0.5 ± 1.2  | 0.6 ± 1.1  |
| Baseline COPD Assessment Test Score                                                      | 20.1 ± 7.3 | 21.3 ± 7.3 | 20.7 ± 7.3 |
| Baseline Modified Medical Research Council score >1, no. (%)                             | 164 (61.2) | 169 (64.0) | 333 (62.6) |
| Entry criteria, no. (%)                                                                  |            |            |            |
| Systemic glucocorticoid or antibiotic use within previous 12 months                      | 246 (91.8) | 228 (86.4) | 474 (89.1) |
| COPD exacerbation leading to ED visit or hospitalization within previous 12 months       | 168 (62.7) | 133 (50.4) | 301 (56.6) |
| Prescription or use of supplemental oxygen within previous 12 months                     | 106 (39.6) | 106 (40.2) | 212 (39.8) |

Abbreviations: COPD (chronic obstructive pulmonary disease), GOLD (Global Initiative for Obstructive Lung Disease), FEV<sub>1</sub> (forced expiratory volume), FVC (forced vital capacity), LABA (long acting beta agonist), LAMA (long acting muscarinic antagonist), ED (emergency department), BMI (body mass index); mm Hg (millimeters of mercury)

Plus minus differences are mean ± standard deviation; co-morbid conditions are self-reported

Supplemental Table S2. Non-fatal and Fatal Serious Adverse Events by Study Group in the Metoprolol Group Compared with the Placebo Group.

| Event                             | Metoprolol<br>(N=268) | Placebo<br>(N=264) | P Value |
|-----------------------------------|-----------------------|--------------------|---------|
| Cardiovascular                    |                       |                    |         |
| Myocardial infarction             | 0.009                 | 0.004              | 0.51    |
| Heart failure                     | 0.008                 | 0.014              | 0.57    |
| Stroke                            | 0.004                 | 0.008              | 0.65    |
| Arrhythmias                       | 0.012                 | 0.008              | 0.71    |
| Hypotension                       | 0                     | 0.004              | 0.31    |
| Other Cardiovascular              | 0.004                 | 0.004              | 0.99    |
| Respiratory                       |                       |                    |         |
| COPD Exacerbation*                | 0.43                  | 0.19               | 0.018   |
| Pneumonia                         | 0.084                 | 0.057              | 0.34    |
| Other Respiratory                 | 0.020                 | 0.004              | 0.16    |
| Gastrointestinal                  | 0.025                 | 0.049              | 0.52    |
| Musculoskeletal                   | 0.008                 | 0.005              | 0.69    |
| Cancer                            |                       |                    |         |
| Lung Cancer                       | 0.004                 | 0.008              | 0.55    |
| Other Cancer                      | 0.010                 | 0.004              | 0.45    |
| Infections, non-pneumonia         | 0                     | 0.026              | 0.24    |
| Head, eyes, ears, nose and throat | 0.004                 | 0.016              | 0.45    |
| Trauma/Falls                      | 0.008                 | 0.012              | 0.66    |
| Neurologic, non-stroke            | 0.004                 | 0.004              | 0.91    |

|                                       |          |         |                    |
|---------------------------------------|----------|---------|--------------------|
| Psychiatric                           | 0.004    | 0       | 0.32               |
| Chest Pain, not otherwise specified   | 0.004    | 0.004   | 0.99               |
| Endocrine                             | 0.004    | 0       | 0.32               |
| Other                                 | 0.008    | 0.008   | 0.97               |
| Total                                 | 0.65     | 0.43    | 0.065              |
|                                       |          |         |                    |
| Fatal event — no. of participants (%) |          |         |                    |
| COPD                                  | 7 (2.6)  | 1 (0.4) | 0.17 <sup>#</sup>  |
| Sudden Cardiac Death                  | 0 (0)    | 1 (0.4) |                    |
| Lung Cancer                           | 1 (0.4)  | 0 (0)   |                    |
| Sepsis                                | 1 (0.4)  | 1 (0.4) |                    |
| Unknown                               | 1 (0.4)  | 2 (0.8) |                    |
| Other                                 | 1 (0.4)  | 0 (0)   |                    |
| Total                                 | 11 (4.1) | 5 (1.9) | 0.14 <sup>##</sup> |

Note: Serious adverse events are as reported by the clinical site investigator. \*COPD exacerbations listed here may not meet the protocol-defined criteria for the primary endpoint. <sup>#</sup>Fisher exact test comparing cause of death between groups. <sup>##</sup>Log-rank test. There were 4 additional deaths in the placebo group (COPD – 1, unknown - 2, lung cancer – 1) and 3 additional deaths in the metoprolol group (COPD – 2, pneumonia - 1) after the treatment period.

Supplemental Table S3: Participant-Reported Possible Beta-Blocker Side Effects by Study Group.

|                              | Metoprolol | Placebo    | Total | P-value |
|------------------------------|------------|------------|-------|---------|
| Total Number of Participants | 268        | 263        | 531   |         |
| Depression                   |            |            |       |         |
| Yes (%)                      | 28 (10.4)  | 39 (14.8)  | 67    | 0.13    |
| Severity                     |            |            |       |         |
| Mild                         | 17 (6.3)   | 28 (10.6)  | 45    |         |
| Moderate                     | 10 (3.7)   | 10 (3.8)   | 20    |         |
| Severe                       | 1 (0.4)    | 1 (0.4)    | 2     |         |
| No Depression                | 240 (89.6) | 224 (85.2) | 464   |         |
| Headache                     |            |            |       |         |
| Yes (%)                      | 71 (26.5)  | 78 (29.7)  | 149   | 0.42    |
| Severity                     |            |            |       |         |
| Mild                         | 53 (19.8)  | 53 (20.2)  | 106   |         |
| Moderate                     | 16 (6.0)   | 23 (8.7)   | 39    |         |
| Severe                       | 2 (0.7)    | 2 (0.8)    | 4     |         |
| No Headache                  | 197 (73.5) | 185 (70.3) | 382   |         |
| Fainting/Passing out         |            |            |       |         |
| Yes (%)                      | 4 (1.5)    | 8 (3.0)    | 12    | 0.23    |
| Severity                     |            |            |       |         |
| Mild                         | 3 (1.1)    | 3 (1.1)    | 6     |         |
| Moderate                     | 0 (0.0)    | 3 (1.1)    | 3     |         |
| Severe                       | 1 (0.4)    | 2 (0.8)    | 3     |         |
| No Fainting/Passing          | 264 (98.5) | 255 (97.0) | 519   |         |
| Daytime Sleepiness           |            |            |       |         |
| Yes (%)                      | 58 (21.6)  | 70 (26.6)  | 128   | 0.18    |
| Severity                     |            |            |       |         |
| Mild                         | 42 (15.7)  | 56 (21.3)  | 98    |         |
| Moderate                     | 12 (4.5)   | 13 (4.9)   | 25    |         |
| Severe                       | 4 (1.5)    | 1 (0.4)    | 5     |         |
| No Daytime                   | 210 (78.4) | 193 (73.4) | 403   |         |
| Memory Loss                  |            |            |       |         |
| Yes (%)                      | 20 (7.5)   | 21 (8.0)   | 41    | 0.82    |
| Severity                     |            |            |       |         |
| Mild                         | 15 (5.6)   | 18 (6.8)   | 33    |         |
| Moderate                     | 5 (1.9)    | 3 (1.1)    | 8     |         |
| Severe                       | 0 (0.0)    | 0 (0.0)    | 0     |         |
| No Memory Loss               | 248 (92.5) | 242 (92.0) | 490   |         |
| Loss of sexual desire        |            |            |       |         |
| Yes (%)                      | 10 (3.7)   | 6 (2.3)    | 16    | 0.33    |
| Severity                     |            |            |       |         |

|                           |            |            |     |      |
|---------------------------|------------|------------|-----|------|
| Mild                      | 9 (3.4)    | 5 (1.9)    | 14  |      |
| Moderate                  | 1 (0.4)    | 1 (0.4)    | 2   |      |
| Severe                    | 0 (0.0)    | 0 (0.0)    | 0   |      |
| No Loss desire            | 258 (96.3) | 257 (97.7) | 515 |      |
| Lack of energy            |            |            |     |      |
| Yes (%)                   | 91 (34.0)  | 77 (29.3)  | 168 | 0.25 |
| Severity                  |            |            |     |      |
| Mild                      | 54 (20.1)  | 51 (19.4)  | 105 |      |
| Moderate                  | 29 (10.8)  | 22 (8.4)   | 51  |      |
| Severe                    | 8 (3.0)    | 4 (1.5)    | 12  |      |
| No Lack of energy         | 177 (66.0) | 186 (70.7) | 363 |      |
| Rash                      |            |            |     |      |
| Yes (%)                   | 17 (6.3)   | 21 (8.0)   | 38  | 0.46 |
| Severity                  |            |            |     |      |
| Mild                      | 13 (4.9)   | 20 (7.6)   | 33  |      |
| Moderate                  | 4 (1.5)    | 1 (0.4)    | 5   |      |
| Severe                    | 0 (0.0)    | 0 (0.0)    | 0   |      |
| No Rash                   | 251 (93.7) | 242 (92.0) | 493 |      |
| Itching                   |            |            |     |      |
| Yes (%)                   | 30 (11.2)  | 22 (8.4)   | 52  | 0.27 |
| Severity                  |            |            |     |      |
| Mild                      | 24 (9.0)   | 19 (7.2)   | 43  |      |
| Moderate                  | 5 (1.9)    | 3 (1.1)    | 8   |      |
| Severe                    | 1 (0.4)    | 0 (0.0)    | 1   |      |
| No Itching                | 238 (88.8) | 241 (91.6) | 479 |      |
| Tongue or facial swelling |            |            |     |      |
| Yes (%)                   | 7 (2.6)    | 5 (1.9)    | 12  | 0.58 |
| Severity                  |            |            |     |      |
| Mild                      | 5 (1.9)    | 3 (1.1)    | 8   |      |
| Moderate                  | 1 (0.4)    | 2 (0.8)    | 3   |      |
| Severe                    | 1 (0.4)    | 0 (0.0)    | 1   |      |
| No Tongue or facial       | 261 (97.4) | 258 (98.1) | 519 |      |
| Vomiting                  |            |            |     |      |
| Yes (%)                   | 11 (4.1)   | 18 (6.8)   | 29  | 0.17 |
| Severity                  |            |            |     |      |
| Mild                      | 10 (3.7)   | 14 (5.3)   | 24  |      |
| Moderate                  | 1 (0.4)    | 3 (1.1)    | 4   |      |
| Severe                    | 0 (0.0)    | 1 (0.4)    | 1   |      |
| No Vomiting               | 257 (95.9) | 245 (93.2) | 502 |      |
| Nausea                    |            |            |     |      |
| Yes (%)                   | 45 (16.8)  | 42 (16.0)  | 87  | 0.80 |
| Severity                  |            |            |     |      |
| Mild                      | 36 (13.4)  | 37 (14.1)  | 73  |      |
| Moderate                  | 9 (3.4)    | 4 (1.5)    | 13  |      |

|                             |            |             |     |      |
|-----------------------------|------------|-------------|-----|------|
| Severe                      | 0 (0.0)    | 1 (0.4)     | 1   |      |
| No Nausea                   | 223 (83.2) | 221 (84.0)  | 444 |      |
| Constipation                |            |             |     |      |
| Yes (%)                     | 30 (11.2)  | 32 (12.2)   | 62  | 0.73 |
| Severity                    |            |             |     |      |
| Mild                        | 24 (9.0)   | 25 (9.5)    | 49  |      |
| Moderate                    | 6 (2.2)    | 6 (2.3)     | 12  |      |
| Severe                      | 0 (0.0)    | 1 (0.4)     | 1   |      |
| No Constipation             | 238 (88.8) | 231 (87.8%) | 469 |      |
| Wheezing                    |            |             |     |      |
| Yes (%)                     | 88 (32.8)  | 79 (30.0)   | 167 | 0.49 |
| Severity                    |            |             |     |      |
| Mild                        | 39 (14.6)  | 26 (9.9)    | 65  |      |
| Moderate                    | 31 (11.6)  | 42 (16.0)   | 73  |      |
| Severe                      | 18 (6.7)   | 11 (4.2)    | 29  |      |
| No Wheezing                 | 180 (67.2) | 184 (70.0)  | 364 |      |
| Shortness of breath         |            |             |     |      |
| Yes (%)                     | 115 (42.9) | 112 (42.6)  | 227 | 0.94 |
| Severity                    |            |             |     |      |
| Mild                        | 31 (11.6)  | 39 (14.8)   | 70  |      |
| Moderate                    | 54 (20.1)  | 56 (21.3)   | 110 |      |
| Severe                      | 30 (11.2)  | 17 (6.5)    | 47  |      |
| No SOB                      | 153 (57.1) | 151 (57.4)  | 304 |      |
| Chest tightness             |            |             |     |      |
| Yes (%)                     | 81 (30.2)  | 80 (30.4)   | 161 | 0.96 |
| Severity                    |            |             |     |      |
| Mild                        | 37 (13.8)  | 38 (14.4)   | 75  |      |
| Moderate                    | 28 (10.4)  | 37 (14.1)   | 65  |      |
| Severe                      | 16 (6.0)   | 5 (1.9)     | 21  |      |
| No Chest tightness          | 187 (69.8) | 183 (69.6)  | 370 |      |
| Heart skipping or irregular |            |             |     |      |
| Yes (%)                     | 16 (6.0)   | 15 (5.7)    | 31  | 0.90 |
| Severity                    |            |             |     |      |
| Mild                        | 13 (4.9)   | 10 (3.8)    | 23  |      |
| Moderate                    | 2 (0.7)    | 3 (1.1)     | 5   |      |
| Severe                      | 1 (0.4)    | 2 (0.8)     | 3   |      |
| No Heart skipping           | 252 (94.0) | 248 (94.3)  | 500 |      |
| Dizziness/light             |            |             |     |      |
| Yes (%)                     | 74 (27.6)  | 64 (24.3)   | 138 | 0.39 |
| Severity                    |            |             |     |      |
| Mild                        | 53 (19.8)  | 41 (15.6)   | 94  |      |
| Moderate                    | 17 (6.3)   | 19 (7.2)    | 36  |      |
| Severe                      | 4 (1.5)    | 4 (1.5)     | 8   |      |
| No Dizziness/light          | 194 (72.4) | 199 (75.7)  | 393 |      |



Supplemental Table S4. Permanent Discontinuation of Study Drug by Treatment Group.

| Reason for Discontinuation, no. (%) | Metoprolol<br>N=268 | Placebo<br>N=264 | Total<br>N=532 |
|-------------------------------------|---------------------|------------------|----------------|
| Cardiac event*                      | 5 (1.9)             | 2 (0.8)          | 8 (1.5)        |
| Respiratory symptoms                | 8 (3.0)             | 3 (1.1)          | 11 (2.1)       |
| Incompatible medications            | 5 (1.9)             | 4 (1.5)          | 9 (1.7)        |
| Allergy                             | 1 (0.4)             | 0 (0)            | 1 (0.2)        |
| Other reason**                      | 11 (4.1)            | 7 (2.7)          | 17 (3.2)       |
| Total                               | 30 (11.2)           | 16 (6.1)         | 46 (8.7)       |

\*Cardiac events, Metoprolol: Arrhythmias (1), Myocardial infarction (1), Congestive heart failure (2), Chest pain (1); Placebo: arrhythmias (2)

\*\*Other reason detail, Metoprolol: Depression/cognitive issues (2), Decreased blood pressure or heart rate (2), Lightheadedness, dizziness, fatigue (3), PCP discretion (1), Peripheral vascular disease (2); Placebo: Depression/cognitive issues (2), Decreased blood pressure or heart rate (1), Lightheadedness, dizziness, fatigue (1), Moderate itching (1), General health decline (1), Stroke (1)

Supplemental Table S5. Estimated Compliance by Study Group.

| Visit Period                  | Metoprolol Compliance (%) | Placebo Compliance (%) |
|-------------------------------|---------------------------|------------------------|
| Randomization to day 14 visit | 90                        | 92                     |
| Day 14 visit to day 28 visit  | 87                        | 88                     |
| Day 28 visit to day 42 visit  | 89                        | 84                     |
| Day 42 to day 112 visit       | 85                        | 83                     |
| Day 112 to day 224 visit      | 81                        | 83                     |
| Day 224 to day 336 visit      | 87                        | 90                     |

Compliance was calculated as the number of doses taken divided by the number of prescribed doses in the given study period and is reported as a percentage.

## References

1. Meguro M, Barley EA, Spencer S, Jones PW. Development and Validation of an Improved, COPD-Specific Version of the St. George Respiratory Questionnaire. *Chest* 2007;132:456-63.
2. Kon SS, Canavan JL, Jones SE, et al. Minimum clinically important difference for the COPD Assessment Test: a prospective analysis. *The Lancet Respiratory medicine* 2014;2:195-203.
3. Eakin EG, Resnikoff PM, Prewitt LM, Ries AL, Kaplan RM. Validation of a new dyspnea measure: the UCSD Shortness of Breath Questionnaire. University of California, San Diego. *Chest* 1998;113:619-24.
